# Supplementary material
Source: publisher figshare collection journal article supplement (https://sage.figshare.com/ndownloader/files/17823146)
Supplement: Supplementary file 1 [file 17823146]

## Sheet: Sheet1
450	Temperature(°C)	Std	Std	Std	4	5	6	7	8	9	10	11	12
	23.8	0.1778	0.2101	0.14	0.4379	0.3819	0.4828	0.5654	0.5406	0.7435	0.8161	1.0076	0.9979
		0.4961	0.4265	0.3585	0.3441	0.3093	0.4561	0.6309	0.6402	0.6735	0.6051	0.6503	0.0526
		0.3538	0.3191	0.3596	0.4366	0.2249	0.502	0.9021	0.986	1.0648
		0.2914	0.3309	0.242	0.4845	0.3561	0.544	0.6345	0.9107	0.7912
		0.1716	0.2364	0.1956	0.4917	0.486	0.534	0.6631	0.703	0.6891
		0.2425	0.2407	0.2465	0.4245	0.4172	0.3662	0.5545	0.5892	0.6142
		0.2393	0.2474	0.2211	0.4286	0.4239	0.3589	0.4324	0.4887	0.5139
		0.224	0.2204	0.1464	0.3304	0.5416	0.609	0.6757	0.6175	1.0878
																				Raven
			570																		Abs1
			Temperature(°C)	1	2	3	4	5	6	7	8	9	10	11	12					Control	0.4379	0.3819	0.4828	0.3441	0.3093	0.4561	0.6051	0.6503
			23.8	0.0392	0.0399	0.0514	0.0526	0.0421	0.0414	0.0486	0.0458	0.0434	0.0437	0.045	0.0452					LD	0.4366	0.2249	0.502	0.4845	0.3561	0.544	0.4917	0.486	0.534
				0.0441	0.0402	0.044	0.0448	0.0437	0.0429	0.0442	0.0438	0.0424	0.0442	0.0495	0.048					HD	0.4245	0.4172	0.3662	0.4286	0.4239	0.3589	0.3304	0.5416	0.609
				0.0425	0.0449	0.0434	0.0471	0.0426	0.0432	0.0439	0.0524	0.0481	0.0501	0.0508	0.0496
				0.0409	0.0416	0.0486	0.0604	0.0417	0.0427	0.0436	0.0632	0.0444	0.0498	0.0697	0.0502					Raven
				0.0408	0.0443	0.0439	0.0512	0.0604	0.0409	0.0427	0.044	0.0421	0.0502	0.0502	0.0498						Concn
				0.0428	0.0448	0.0403	0.0441	0.0529	0.0413	0.0414	0.0471	0.0431	0.0499	0.0503	0.0665					Control	80.4545	67.7273	90.6591	59.1364	51.2273	84.5909	118.455	128.727
				0.0401	0.0417	0.0396	0.0471	0.045	0.0411	0.0422	0.0472	0.0433	0.0497	0.0502	0.0535					LD	80.1591	32.0455	95.0227	91.0455	61.8636	104.568	92.6818	91.3864	102.295
				0.0408	0.0424	0.0403	0.0531	0.0423	0.0426	0.0439	0.0439	0.058	0.0402	0.0497	0.062					HD	77.4091	75.75	64.1591	78.3409	77.2727	62.5	56.0227	104.023	119.341
				Temperature(°C)	1	2	3	4	5	6	7	8	9	10	11	12
				23.9	0.1786	0.2069	0.1277	0.4215	0.3732	0.4701	0.5597	0.5257	0.7191	0.7955	0.9808	0.9797
					0.4868	0.4217	0.3553	0.3486	0.3056	0.4626	0.6167	0.631	0.6695	0.5899	0.636	0.0526
					0.351	0.3242	0.3562	0.4328	0.219	0.4965	0.8893	0.9808	1.0522	0.0514	0.052	0.0508
					0.2913	0.3279	0.236	0.4727	0.3404	0.538	0.6331	0.9122	0.7917	0.0516	0.0513	0.0512
					0.1713	0.2363	0.2027	0.4827	0.473	0.5185	0.6538	0.6788	0.6809	0.0511	0.0513	0.0508
					0.2507	0.2383	0.2467	0.4158	0.4125	0.3684	0.5479	0.6027	0.6157	0.0508	0.0514	0.0661
					0.2366	0.2441	0.2198	0.417	0.4083	0.3494	0.4249	0.4703	0.51	0.0508	0.0513	0.0571
					0.2288	0.2199	0.1476	0.3254	0.5355	0.5943	0.6706	0.6088	1.0742	0.043	0.053	0.0534
		Standards	Absorbance			Std Concn	Average Absorbance
			0.2105	0.3469	0.318	50	0.2918
			0.1809	0.2242	0.2373	25	0.214133													Anova: Single Factor
			0.1447	0.135	0.1432	12.5	0.140967
			0.1085	0.117	0.121	6.25	0.1155													SUMMARY
			0.097	0.0985	0.0872	3.125	0.0942333													Groups	Count	Sum	Average	Variance	Stnd. D.
			0.0863	0.085	0.0787	1.5625	0.0833333													Control	8	680.977	85.1222	741.698	27.2341
			0.0852	0.0821	0.0773	0.78125	0.0815333													LD	9	751.068	83.452	532.524	23.0765
																				HD	9	714.818	79.4242	411.109	20.2758
